# Supplementary material for: Cryptococcus neoformans Requires a Functional Glycolytic Pathway for Disease but Not Persistence in the Host
Source: PubMed Central journal article supplement — mBio. 2011 Jun 7;2(3):e00103-11. doi: 10.1128/mBio.00103-11 (PMC3110414; doi:10.1128/mbio.00103-11), 2011-06-07
Supplement: mBio.00103-11-s1.pdf [file mBio.00103-11-s1.pdf]

## Supplemental Methods

**Growth curve.** WT, *pyk1Δ*, *pyk1Δ + PYK1*, *pyk1Δ/mig1Δ*, and *mig1Δ* strains were inoculated into 10mL YPLR broth and incubated at 30°C with shaking for 24hrs. The cells were then centrifuged, washed once with 10mL sterile PBS, and resuspended in 2.5-5mL sterile PBS for quantification by hemocytometer count. Each strain ( $1 \times 10^6$  CFU per strain) was then inoculated into 50mL Yeast Peptone Lactate broth (YPLac; 1% yeast extract, 2% peptone, 2% lactic acid) broth and incubated at 30°C with shaking for 90hrs. Optical density (600nm) was measured for 3 samples (1mL each) per strain at set time-points.

**Survival in macrophages.** The ability of the *pyk1Δ* and *hvk1Δ/hvk2Δ* mutants to survive in macrophages was assessed as previously described (1-3). WT, *pyk1Δ*, *pyk1Δ + PYK1*, *pyk1Δ/mig1Δ*, *hvk1Δ*, *hvk2Δ*, and *hvk1Δ/hvk2Δ* strains were inoculated into YPLR broth and incubated at 30°C for 24hrs with shaking to provide inocula for the macrophage survival assay. All inocula were cultured on YPLac agar plates for quantitative counts of colony forming units to normalize the *C. neoformans* cells in the macrophage killing assay. Briefly,  $1 \times 10^5$  activated macrophages (strain J774A.1) were coincubated in a 96-well microtiter plate with  $1 \times 10^5$  cells of each *C. neoformans* strain that were opsonized with monoclonal antibody mAb18b7 (a gift from Arturo Casadevall; (2)) at 37°C, 5% CO<sub>2</sub>. Following 18-24 hrs of coincubation, the macrophages were lysed with 0.5% SDS. Lysates were serially diluted and plated on YPLac plates for quantitative counts of CFU for each strain. Triplicate cultures were performed for each *C. neoformans* strain.

**H<sub>2</sub>O<sub>2</sub> and nitric oxide susceptibility testing.** *C. neoformans* H99, *pyk1Δ*, *pyk1Δ + PYK1*, *pyk1Δ/mig1Δ*, *mig1Δ*, *hvk1Δ*, *hvk2Δ*, and *hvk1Δ/hvk2Δ* strains were incubated in YPLR broth to saturation at 30°C with shaking to serve as inocula for the H<sub>2</sub>O<sub>2</sub> and nitric oxide sensitivity assays. Yeast nitrogen base-lactate-raffinose (YNBLR; 6.7g/L Yeast Nitrogen Base minus amino acids, 2% lactic acid, 1% raffinose) broth was made either buffered at pH4 with 25mM succinic acid (nitric oxide assay) or not buffered (H<sub>2</sub>O<sub>2</sub> assay) and filter sterilized. Each *C. neoformans* strain was diluted in the appropriate YNBLR broth (YNBLR for H<sub>2</sub>O<sub>2</sub>; YNBLR (pH4) for nitric oxide) to  $1 \times 10^5$  CFU/mL. 100μL of each strain dilution was inoculated into each well of a 96-well microtiter plate, one row (12 wells) per strain. Sodium nitrite (NaNO<sub>2</sub>) was used to generate nitric oxide due to the spontaneous generation of nitric oxide from nitrite at acidic pH (4). Serial 2-fold dilutions of either H<sub>2</sub>O<sub>2</sub> or NaNO<sub>2</sub> were performed in the appropriate YNBLR medium from 16mM to 15.6μM. These dilutions, including a 0mM control, were added to the 96-well plates by column (100μL per well) resulting in a dilution series from 8mM to 7.81μM. The microtiter plates were then incubated at 30°C for 72hrs and viewed. The highest H<sub>2</sub>O<sub>2</sub> or NaNO<sub>2</sub> concentration allowing growth of the yeast was recorded as the minimum inhibitory concentration (MIC).

**Statistical analysis.** Unless otherwise noted, all statistical analyses were performed using Microsoft Excel 2008 (Microsoft Corp., Redmond WA) using Student's *t*-test.

## References

1. Cox, G. M., et al. 2003. Superoxide dismutase influences the virulence of *Cryptococcus neoformans* by affecting growth within macrophages. *Infect. Immun.* **71**:173-80.

## Supplemental Methods

2. **Wormley, F. L., Jr., G. Heinrich, J. L. Miller, J. R. Perfect, and G. M. Cox.** 2005. Identification and characterization of an *SKN7* homologue in *Cryptococcus neoformans*. *Infect. Immun.* **73**:5022-30.
3. **Price, M. S., C. B. Nichols, and J. A. Alspaugh.** 2008. The *Cryptococcus neoformans* Rho-GDP dissociation inhibitor mediates intracellular survival and virulence. *Infect. Immun.* **76**:5729-37.
4. **Alspaugh, J. A., and D. L. Granger.** 1991. Inhibition of *Cryptococcus neoformans* replication by nitrogen oxides supports the role of these molecules as effectors of macrophage-mediated cytostasis. *Infect. Immun.* **59**:2291-6.
