# Supplementary material for: Cryptococcus neoformans Requires a Functional Glycolytic Pathway for Disease but Not Persistence in the Host
Source: PubMed Central journal article supplement — mBio. 2011 Jun 7;2(3):e00103-11. doi: 10.1128/mBio.00103-11 (PMC3110414; doi:10.1128/mbio.00103-11), 2011-06-07
Supplement: mBio.00103-11-st1.pdf [file mBio.00103-11-st1.pdf]

**Table S1. List of strains used in this study.**

| Name  | Genotype                      | Reference  |
|-------|-------------------------------|------------|
| H99   | Wild-type                     | (53)       |
| 44-1  | Wild-type                     | this study |
| HC1   | Wild-type                     | this study |
| GGH20 | <i>acs1Δ::NEO</i>             | (31)       |
| GGH22 | <i>snf1Δ::NEO</i>             | (31)       |
| GGH25 | <i>snf1Δ::NEO, SNF1+NAT</i>   | (31)       |
| JPC1  | <i>pck1Δ::NEO</i>             | this study |
| JPC2  | <i>pck1Δ::NEO</i>             | this study |
| MPC31 | <i>pyk1Δ::NEO</i>             | this study |
| MPC36 | <i>pyk1Δ::NEO, PYK1+NAT</i>   | this study |
| GGH51 | <i>mig1Δ::NAT</i>             | this study |
| MPC37 | <i>mig1Δ::NAT, pyk1Δ::NEO</i> | this study |
| MPC38 | <i>hvk1Δ::NEO</i>             | this study |
| AI110 | <i>hvk2Δ::NAT</i>             | (32)       |
| MPC39 | <i>hvk1Δ::NEO, hvk2Δ::NAT</i> | this study |
