# Supplementary material for: Cryptococcus neoformans Requires a Functional Glycolytic Pathway for Disease but Not Persistence in the Host
Source: PubMed Central journal article supplement — mBio. 2011 Jun 7;2(3):e00103-11. doi: 10.1128/mBio.00103-11 (PMC3110414; doi:10.1128/mbio.00103-11), 2011-06-07
Supplement: mBio.00103-11-st2.pdf [file mBio.00103-11-st2.pdf]

**Table S2. DNA PCR primers used in this study.**

| Function                     | Target | Primer Number | Sequence                                  |
|------------------------------|--------|---------------|-------------------------------------------|
| Real-time PCR                | PCK1   | CNI03590 For  | CCGAAAAAGAACCCGAGAT                       |
|                              |        | CNI03590 Rev  | TAACCAGCGACGAAGTGGTA                      |
|                              | FBP1   | MP0098        | CGAGAGGGGATTTTGATAG                       |
|                              |        | MP0099        | GGCACCTACTGTGTTGTCTT                      |
|                              | ACS1   | MP0104        | GTTTTAGTGCCGAGAGTTTG                      |
|                              |        | MP0105        | CCAGAGGTGTAGAGGATGAA                      |
| Gene deletion/reconstitution | PCK1   | PCK1ko#1F     | TACGGACGGAGGAAAGAATG                      |
|                              |        | PCK1ko#3R     | AGCTCACATCCTCGCAGCGATGACTGTTGTGGGCATTG    |
|                              |        | PCK1ko#2F     | CAATGCCCAACAACAGTCATCGCTGCGAGGATGTGAGCTGG |
|                              |        | PCK1ko#5R     | ATGACCAGACAAAGGGTGGAGAAGAGATGTAGAAACTA    |
|                              |        | PCK1ko#4F     | TAGTTTCTACATCTCTTCTCCACCCTTTGTCTGGTCAT    |
|                              |        | PCK1ko#6R     | AACTCACGTTTCGCCATATCC                     |
|                              | PYK1   | PYK1ko #1F    | GCCACTTCACACTCACAATCA                     |
|                              |        | PYK1ko #3R    | CCAGCTCACATCCTCGCAGCTTTGGGGAGGATAATGTCCA  |
|                              |        | PYK1ko #2F    | TGGACATTATCCTCCCCAAAGCTGCGAGGATGTGAGCTGG  |
|                              |        |               |                                           |

|                                    |        |              |                                        |
|------------------------------------|--------|--------------|----------------------------------------|
|                                    |        | PYK1ko #5R   | CTCATGTGCGCACAAATGACCGAAGAGATGTAGAACTA |
|                                    |        | PYK1ko #4F   | TAGTTTCTACATCTCTTCGGTCATTTGTGCGACATGAG |
|                                    |        | PYK1ko #6R   | GGCTGCACTACGTTGTACGAT                  |
| HXK1                               | MP0037 |              | AAGGGGATTGATTACGTTTT                   |
|                                    | MP0038 |              | GTCATAGCTGTTTCCTGAGGAAGAAGGAAGCAGAGAT  |
|                                    | MP0054 |              | ATCTCTGCTTCCTTCTTCCTCAGGAAACAGCTATGAC  |
|                                    | MP0070 |              | CTGGCCGTCGTTTTACCTGCAGTCCTTTGAGAAG     |
|                                    | MP0071 |              | CCAACCGACGTACATAGA                     |
|                                    | MP0072 |              | CTTCTCAAAGGACTGCAGGTAAAACGACGGCCAG     |
| Southern analysis of transformants | NEO    | Neo probe F  | TATGTCCTGATAGCGGTCCG                   |
|                                    |        | Neo probe R  | AAGATGGATTGCACGCAGG                    |
|                                    | PCK1   | PCK1 probe F | CCCTCTTCATGGTAAGTCAA                   |
|                                    |        | PCK1 probe R | AATGCAAAAGGTGATATTGG                   |
|                                    | PYK1   | MP0056       | CAGTGTTGACATGATCTTCG                   |
|                                    |        | MP0057       | TAGGCGATAGAAGACTCAGC                   |
