# Supplementary figures and images for: Cryptococcus neoformans Requires a Functional Glycolytic Pathway for Disease but Not Persistence in the Host
Source: PubMed Central journal article supplement — mBio. 2011 Jun 7;2(3):e00103-11. doi: 10.1128/mBio.00103-11 (PMC3110414; doi:10.1128/mbio.00103-11), 2011-06-07

**Figure S1**

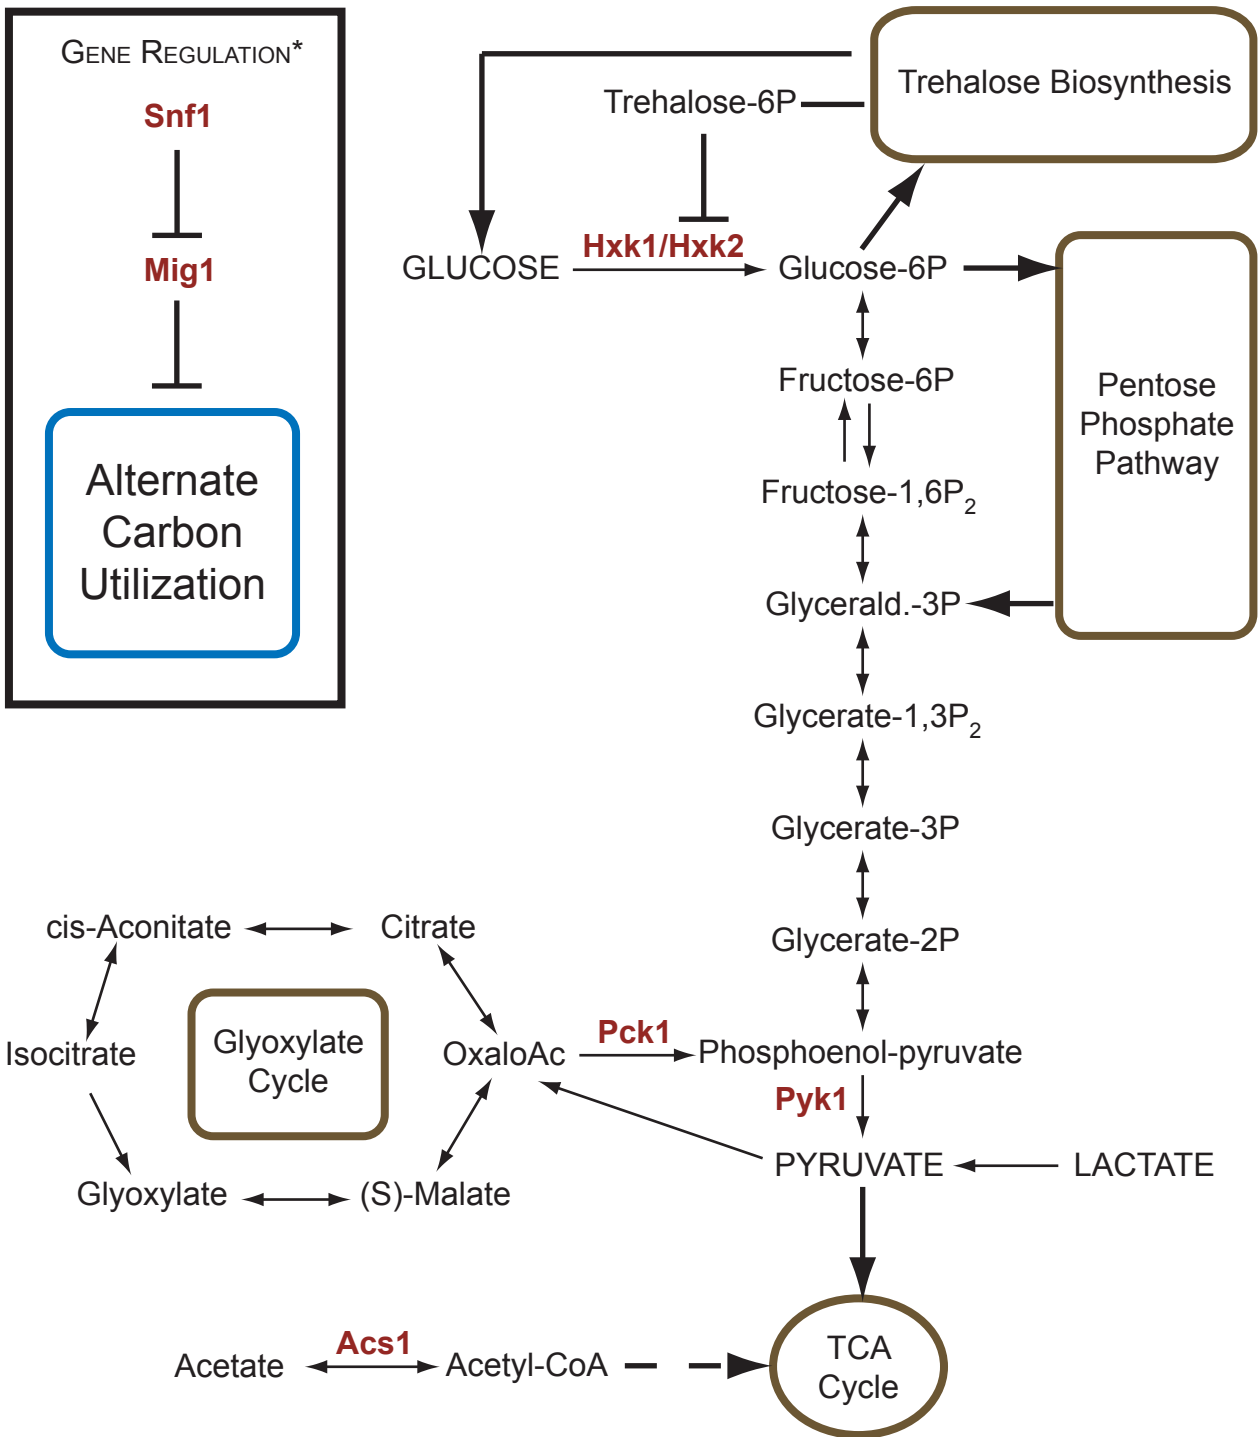

Supplement: mBio.00103-11-sf01.pdf [file mBio.00103-11-sf01.pdf]

**Figure S2**

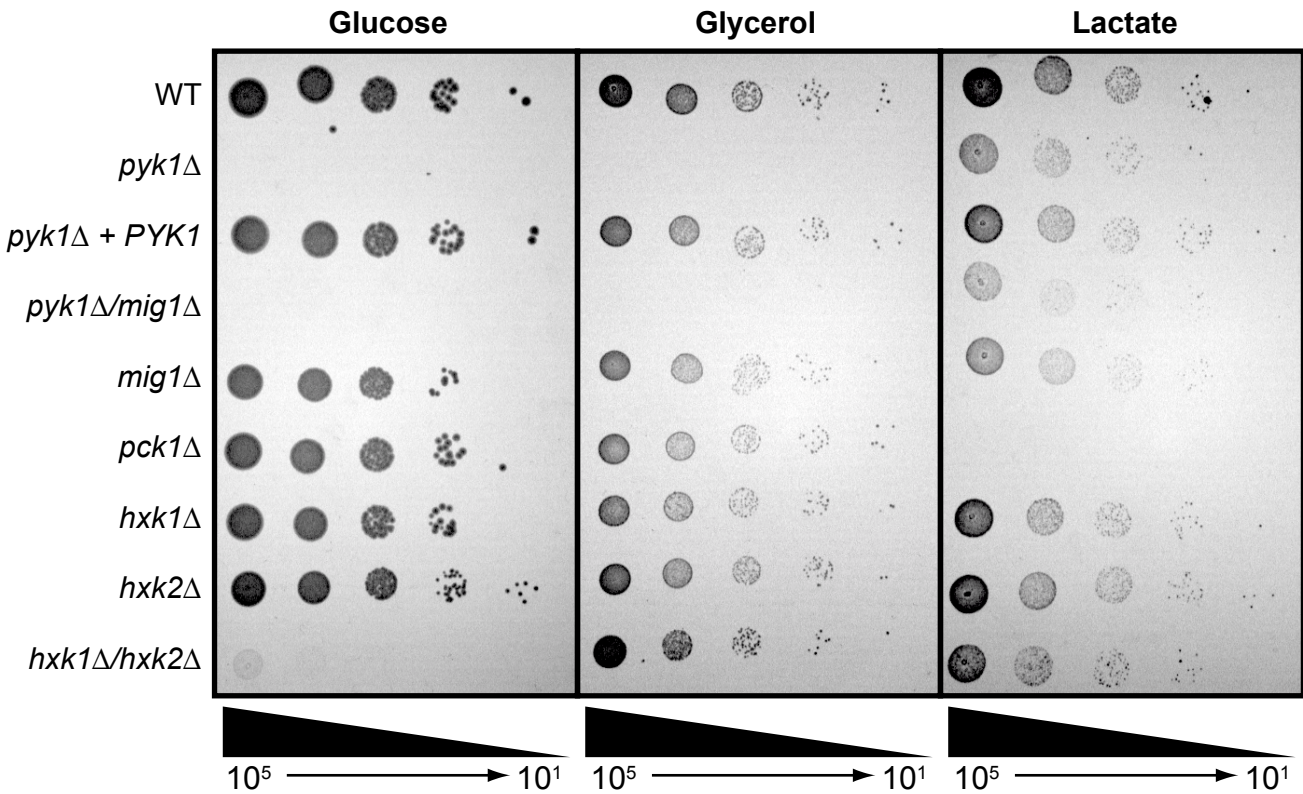

Supplement: mBio.00103-11-sf02.pdf [file mBio.00103-11-sf02.pdf]

# Figure S3

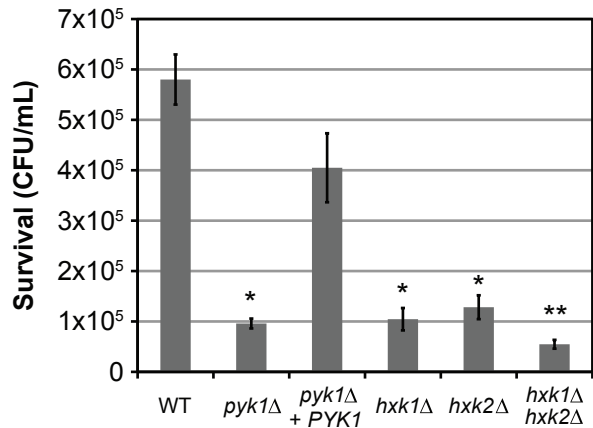

Supplement: mBio.00103-11-sf03.pdf [file mBio.00103-11-sf03.pdf]
